# Supplementary figures and images for: Astaxanthin slows down skeletal muscle atrophy in H22 tumor-bearing mice during sorafenib treatment by modulating the gut microbiota
Source: Royal Society of Chemistry journal article supplement (doi:10.1039/d3fo04633h), 2023-12-20

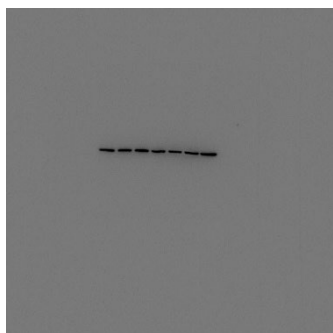

Fig.11A Akt

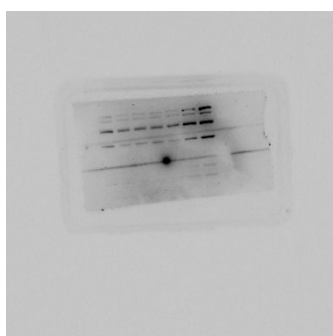

Fig.11A p-Akt

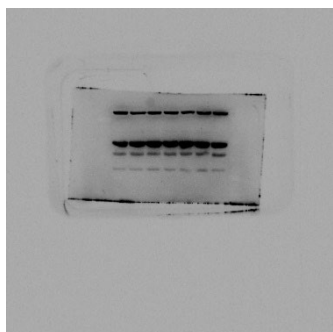

Fig.11A Foxo3a

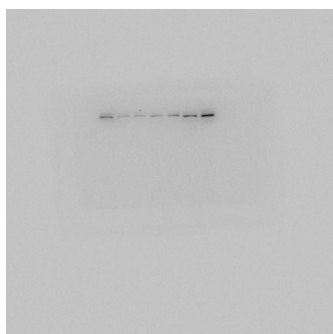

Fig.11A p-Foxo3a

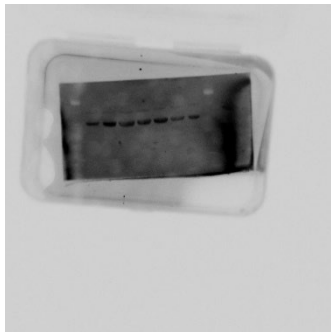

Fig.9A Fbx32

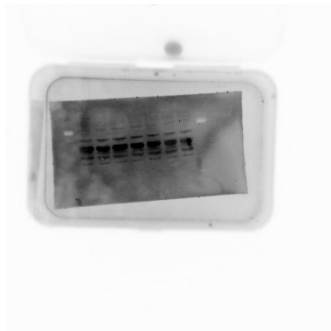

Fig.9A MuRF1

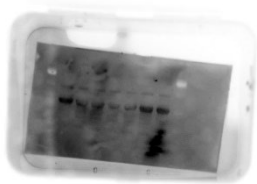

Fig.9A MyoD1

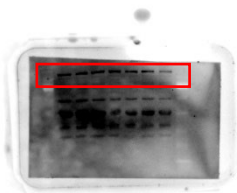

Fig.9A HK2

Supplement: d3fo04633h2.pdf [file d3fo04633h2.pdf]
